# Supplementary material for: Polyploidization Increases the Lipid Content and Improves the Nutritional Quality of Rice
Source: MDPI journal article supplement (doi:10.3390/plants11010132), 2022-01-04
Supplement: s1 [file s1]

**Supplementary Table S1. Classification and phenotypes of the 4 rice cultivars used for metabolomics**

| Cultivar             | Ploidy     | Grain Type | Bran Color | Country of Origin | Growing Location |
|----------------------|------------|------------|------------|-------------------|------------------|
| Balilla              | Diploid    | Short      | Brown      | Italy             | China            |
| Tetraploid Balilla   | Tetraploid | Short      | Brown      | China             | China            |
| Yangdao 6            | Diploid    | Long       | Brown      | China             | China            |
| Tetraploid Yangdao 6 | Tetraploid | Long       | Brown      | China             | China            |

Abbreviations in the text: ① B-2X: Balilla-2X; ② B-4X: Balilla-4X; ③ Y-2X: Yangdao 6-2X; ④ Y-4X: Yangdao 6-4X.
